# Supplementary material
Source: PubMed Central journal article supplement (PMC5673557)
Supplement: NIHMS910027-supplement-5.pdf [file NIHMS910027-supplement-5.pdf]

**Table S1: Flow Cytometry Panels**

| Tube # | FITC  | PerCP | APC    | APC-Cy5.5/AF-700 | APC-Cy7/AF-750 | PE    | PE-TR/PE-AF610 | PE-Cy5 | PE-Cy5.5 | PE-Cy7 |
|--------|-------|-------|--------|------------------|----------------|-------|----------------|--------|----------|--------|
| 1      | CD23  | CD20  | IgM    | CD38             | CD27           | CD10  | CD24           | X      | CD5      | CD19   |
| 2      | CD23  | X     | IgM    | CD38             | CD27           | IgD   | CD24           | CD21   | X        | CD19   |
| 3      | CD23  | CD20  | HLA-DR | CD38             | CD27           | X     | X              | CD138  | X        | CD19   |
| 4      | IgD   | 9G4   | IgM    | CD38             | CD27           | X     | X              | X      | CD5      | CD19   |
| 5      | CD23  | X     | IgM    | CD38             | CD27           | CD267 | X              | CD95   | X        | CD19   |
| 6      | NKG2D | CD45  | NKp44  | CD56             | CD3            | CD8   | CD4            | CD62L  | X        | CD16   |

Tubes 1-5 Live Dead Dump #1 = CD3, CD8, CD14

Tube 6 Live Dead Dump #2 = CD19, CD 14

X = blank
