# Supplementary material
Source: PubMed Central journal article supplement (PMC5673557)
Supplement: NIHMS910027-supplement-7.pdf [file NIHMS910027-supplement-7.pdf]

|                      | ALC#         | 1500       | 2200       | 1500       | 2800       | 1300       | 1800       | 1300       | 2900       | 2800       | 1900       | 1800       | 2900       | 2800       | 1200       | 2100       | 2400       |
|----------------------|--------------|------------|------------|------------|------------|------------|------------|------------|------------|------------|------------|------------|------------|------------|------------|------------|------------|
| Parent gates         | Final gate   | C1         | C2         | C3         | C4         | C5         | C6         | C7         | C8         | C9         | C10        | C11        | C12        | C13        | C14        | C15        | C16        |
| Lymphs               | %CD3+        | 66.2       | 77.6       | 49.2       | 62         | 78         | 83.7       | 70.8       | 82.5       | 64.6       | 68.4       | 81.2       | 65.8       | 70.9       | 66.9       | 81.7       | 74.9       |
| Lymphs               | #CD3+        | 993        | 1707.2     | 738        | 1736       | 1014       | 1506.6     | 920.4      | 2392.5     | 1808.8     | 1299.6     | 1461.6     | 1908.2     | 1985.2     | 802.8      | 1715.7     | 1797.6     |
| Lymphs               | %CD3-        | 33.8       | 22.4       | 50.8       | 38         | 22         | 16.3       | 29.2       | 17.5       | 35.4       | 31.6       | 18.8       | 34.2       | 29.1       | 33.1       | 18.3       | 25.1       |
| Lymphs               | #CD3-        | 507        | 492.8      | 762        | 1064       | 286        | 293.4      | 379.6      | 507.5      | 991.2      | 600.4      | 338.4      | 991.8      | 814.8      | 397.2      | 384.3      | 602.4      |
| Lymphs               | %CD19+       | 15.1       | 9.23       | 13.1       | 18.6       | 6.09       | 7.61       | 12.5       | 7.69       | 14.9       | 9.97       | 8.88       | 26.8       | 9.28       | 6.4        | 10.3       | 7.18       |
| Lymphs               | #CD19+       | 226.5      | 203.06     | 196.5      | 520.8      | 79.17      | 136.98     | 162.5      | 223.01     | 417.2      | 189.43     | 159.84     | 777.2      | 259.84     | 76.8       | 216.3      | 172.32     |
| Lymphs               | %CD20+       | 15.8       | 9.43       | 13.1       | 18.6       | 6.11       | 7.62       | 12.6       | 7.82       | 14.9       | 10.1       | 8.99       | 26.7       | 9.5        | 6.44       | 10         | 7.06       |
| Lymphs               | #CD20+       | 237        | 207.46     | 196.5      | 520.8      | 79.43      | 137.16     | 163.8      | 226.78     | 417.2      | 191.9      | 161.82     | 774.3      | 266        | 77.28      | 210        | 169.44     |
| Lymphs               | %CD19+ CD20+ | 15.7       | 9.48       | 13.2       | 18.6       | 6.11       | 7.59       | 12.6       | 7.78       | 14.8       | 10         | 8.93       | 26.7       | 9.46       | 6.41       | 10         | 7.01       |
| Lymphs               | #CD19+ CD20+ | 235.5      | 208.56     | 198        | 520.8      | 79.43      | 136.62     | 163.8      | 225.62     | 414.4      | 190        | 160.74     | 774.3      | 264.88     | 76.92      | 210        | 168.24     |
| Lymphs, CD19+        | %IgM+        | 41         | 26.5       | 37.2       | 30.7       | 22.6       | 29.2       | 47.3       | 65.7       | 41.2       | 49.2       | 36.9       | 30.1       | 24.6       | 37.7       | 32.6       | 41.5       |
| Lymphs, CD19+        | #IgM+        | 92.865     | 53.8109    | 73.098     | 159.8856   | 17.89242   | 39.99816   | 76.8625    | 146.51757  | 171.8864   | 93.19956   | 58.98096   | 233.9372   | 63.92064   | 28.9536    | 70.5138    | 71.5128    |
| Lymphs, CD19+        | %IgM- IgD-   | 15.6       | 10.8       | 12.4       | 18.8       | 15         | 22.1       | 16.2       | 25.4       | 26.1       | 24.8       | 34.7       | 14         | 23.6       | 48.1       | 30.8       | 39.1       |
| Lymphs, CD19+        | #IgM- IgD-   | 35.334     | 21.93048   | 24.366     | 97.9104    | 11.8755    | 30.27258   | 26.325     | 56.64454   | 108.8892   | 46.97864   | 55.46448   | 108.808    | 61.32224   | 36.9408    | 66.6204    | 67.37712   |
| Lymphs, CD19+        | %Trans       | 8.41       | 4.08       | 2.79       | 4.52       | 4.77       | 4.98       | 3.72       | 7.65       | 7.42       | 6.16       | 5.48       | 3.94       | 3.89       | 8.29       | 5.53       | 2.41       |
| Lymphs, CD19+        | #Trans       | 19.04865   | 8.284848   | 5.48235    | 23.54016   | 3.776409   | 6.821604   | 6.045      | 17.060265  | 30.95624   | 11.668888  | 8.759232   | 30.62168   | 10.107776  | 6.36672    | 11.96139   | 4.152912   |
| Lymphs, CD19+        | %MN          | 74.6       | 81.7       | 54.5       | 80.2       | 71.6       | 70.1       | 82.2       | 57.3       | 66.3       | 57.8       | 73.8       | 86.3       | 79.1       | 48.8       | 44.8       | 69.7       |
| Lymphs, CD19+        | #MN          | 168.969    | 165.90002  | 107.0925   | 417.6816   | 56.68572   | 96.02298   | 133.575    | 127.78473  | 276.6036   | 109.49054  | 117.96192  | 670.7236   | 205.53344  | 37.4784    | 96.9024    | 120.10704  |
| Lymphs, CD19+        | %MA          | 10.8       | 8.25       | 37.8       | 11.7       | 13.1       | 17.2       | 10.5       | 28.8       | 21.8       | 29.5       | 16.5       | 5.88       | 12.5       | 35.6       | 24.4       | 16.8       |
| Lymphs, CD19+        | #MA          | 24.462     | 16.75245   | 74.277     | 60.9336    | 10.37127   | 23.56056   | 17.0625    | 64.22688   | 90.9496    | 55.88185   | 26.3736    | 45.69936   | 32.48      | 27.3408    | 52.7772    | 28.94976   |
| Lymphs, CD19+        | %RM          | 2          | 1.45       | 1.16       | 1.78       | 6.8        | 5.07       | 2.52       | 4.75       | 2.51       | 3.95       | 2.91       | 2.81       | 3.16       | 4.89       | 16.4       | 8.38       |
| Lymphs, CD19+        | #RM          | 4.53       | 2.94437    | 2.2794     | 9.27024    | 5.38356    | 6.944886   | 4.095      | 10.592975  | 10.47172   | 7.482485   | 4.651344   | 21.83932   | 8.210944   | 3.75552    | 35.4732    | 14.440416  |
| Lymphs, CD19+        | %PB          | 0.33       | 2.18       | 0.44       | 0.31       | 0.2        | 0.57       | 0.16       | 0.45       | 0.13       | 0.74       | 0.11       | 0.12       | 0.19       | 0.45       | 2.56       | 0.76       |
| Lymphs, CD19+        | #PB          | 0.74745    | 4.426708   | 0.8646     | 1.61448    | 0.15834    | 0.780786   | 0.26       | 1.003545   | 0.54236    | 1.401782   | 0.175824   | 0.93264    | 0.493696   | 0.3456     | 5.53728    | 1.309632   |
| Lymphs, CD19+        | CD267+       | 40         | 21.7       | 41.3       | 25.4       | 39.4       | 38.5       | 17.5       | 58         | 56.6       | 56.4       | 45.5       | 18.7       | 31.7       | 78.9       | 69.8       | 44.6       |
| Lymphs, CD19+        | #CD267+      | 90.6       | 44.06402   | 81.1545    | 132.2832   | 31.19298   | 52.7373    | 28.4375    | 129.3458   | 236.1352   | 106.83852  | 72.7272    | 145.3364   | 82.36928   | 60.5952    | 150.9774   | 76.85472   |
| Lymphs, CD19+        | %CD 267+++   | 0.56       | 0.36       | 1.19       | 0.54       | 1.07       | 0.58       | 0.73       | 1.73       | 0.53       | 0.66       | 0.62       | 0.39       | 0.74       | 0.94       | 0.86       | 1.1        |
| Lymphs, CD19+        | #CD 267+++   | 0.50736    | 0.15863047 | 0.96573855 | 0.71432928 | 0.33376489 | 0.30587634 | 0.20759375 | 2.23768234 | 1.25151656 | 0.70513423 | 0.45090864 | 0.56681196 | 0.60953267 | 0.56959488 | 1.29840564 | 0.84540192 |
| Lymphs, CD19+, Trans | %CD267+      | 13.9       | 16.3       | 18.7       | 17.3       | 16.4       | 26.8       | 7.1        | 22.8       | 21.9       | 28.9       | 23.8       | 14.2       | 15.6       | 33.3       | 39.6       | 24.5       |
| Lymphs, CD19+, Trans | #CD267+      | 2.64776235 | 1.35043022 | 1.02519945 | 4.07244768 | 0.61933108 | 1.82818987 | 0.429195   | 3.88974042 | 6.77941656 | 3.37230863 | 2.08469722 | 4.34827856 | 1.57681306 | 2.12011776 | 4.73671044 | 1.01746344 |
| Lymphs, CD19+, MN    | %CD267+      | 28.9       | 15.6       | 22.1       | 18.7       | 26.3       | 32.8       | 7.31       | 37.1       | 48         | 36.6       | 37.6       | 12.6       | 24.4       | 64.9       | 53.9       | 31.1       |
| Lymphs, CD19+, MN    | #CD267+      | 48.832041  | 25.8804031 | 23.6674425 | 78.1064592 | 14.9083444 | 31.4955374 | 9.7643325  | 47.4081348 | 132.769728 | 40.0735376 | 44.3536819 | 84.5111736 | 50.1501594 | 24.3234816 | 52.2303936 | 37.3532894 |
| Lymphs, CD19+, MA    | %CD267+      | 90.6       | 81.6       | 89.6       | 84.5       | 89.8       | 90.5       | 89.1       | 97.6       | 97         | 96.1       | 95.1       | 79.7       | 95.4       | 96.8       | 98         | 94         |
| Lymphs, CD19+, MA    | #CD267+      | 22.162572  | 13.6699992 | 66.552192  | 51.488892  | 9.31340046 | 21.3223068 | 15.2026875 | 62.6854349 | 88.221112  | 53.7024579 | 25.0812936 | 36.4223899 | 30.98592   | 26.4658944 | 51.721656  | 27.2127744 |
| Lymphs, CD19+, RM    | %CD267+      | 96.5       | 95.8       | 94.3       | 92         | 93         | 94.8       | 87         | 96.6       | 95.4       | 92.8       | 100        | 84.5       | 88.7       | 93.8       | 93.9       | 91.1       |
| Lymphs, CD19+, RM    | #CD267+      | 1.93       | 1.3891     | 1.09388    | 1.6376     | 6.324      | 4.80636    | 2.1924     | 4.5885     | 2.39454    | 3.6656     | 2.91       | 2.37445    | 2.80292    | 4.58682    | 15.3996    | 7.63418    |
| Lymphs, CD19+        | %Kappa+      | 56.2       | 63.4       | 60.1       | 59.5       | 58.8       | 62.1       | 56.8       | 56.5       | 54         | 53         | 54.2       | 55.4       | 56.3       | 48.7       | 59.8       | 55.4       |
| Lymphs, CD19+        | #Kappa+      | 127.293    | 128.74004  | 118.0965   | 309.876    | 46.55196   | 85.06458   | 92.3       | 126.00065  | 225.288    | 100.3979   | 86.63328   | 430.5688   | 146.28992  | 37.4016    | 129.3474   | 95.46528   |
| Lymphs, CD19+, Trans | %Kappa+      | 59.4       | 59.2       | 62.6       | 61.5       | 61.2       | 59.7       | 55.3       | 62.5       | 57.2       | 62.1       | 57.6       | 63.1       | 60.7       | 58.7       | 64.1       | 59.7       |
| Lymphs, CD19+, Trans | #Kappa+      | 11.3148981 | 4.90463002 | 3.4319511  | 14.4771984 | 2.31116231 | 4.07249759 | 3.342885   | 10.6626656 | 17.7069693 | 7.24637945 | 5.04531763 | 19.3222801 | 6.13542003 | 3.73726464 | 7.66725099 | 2.47928846 |
| Lymphs, CD19+, MN    | %Kappa+      | 56.2       | 63.1       | 61.9       | 59.3       | 61.2       | 61.8       | 57.3       | 60         | 54         | 56.7       | 54.8       | 56.5       | 57.1       | 49         | 65.8       | 59.5       |
| Lymphs, CD19+, MN    | #Kappa+      | 94.960578  | 104.682913 | 66.2902575 | 247.685189 | 34.6916606 | 59.3422016 | 76.538475  | 76.670838  | 149.365944 | 62.0811362 | 64.6431322 | 378.958834 | 117.359594 | 18.364416  | 63.7617792 | 71.4636888 |
| Lymphs, CD19+, MA    | %Kappa+      | 57.3       | 67.2       | 58.8       | 60.9       | 60.6       | 67.6       | 53.5       | 56.9       | 54.1       | 47.6       | 53.4       | 44.6       | 55.6       | 47.6       | 56.8       | 49.4       |
| Lymphs, CD19+, MA    | #Kappa+      | 14.016726  | 11.2576464 | 43.674876  | 37.1085624 | 6.28498962 | 15.9269386 | 9.1284375  | 36.5450947 | 49.2037336 | 26.5997606 | 14.0835024 | 20.3819146 | 18.05888   | 13.0142208 | 29.9774496 | 14.3011814 |
| Lymphs, CD19+, RM    | %Kappa+      | 51.5       | 25.5       | 20.4       | 47.6       | 28         | 49         | 23.3       | 19.9       | 38.2       | 17.3       | 33.3       | 15.8       | 37.5       | 27.6       | 49.4       | 24.4       |
| Lymphs, CD19+, RM    | #Kappa+      | 2.33295    | 0.75081435 | 0.4649976  | 4.41263424 | 1.5073968  | 3.40299414 | 0.954135   | 2.10800203 | 4.00019704 | 1.29446991 | 0.29443008 | 3.45061256 | 3.079104   | 1.03652352 | 17.5237608 | 3.5234615  |

Table S3

| Parent gates                 | Final gate   | C1         | C2         | C3         | C4         | C5         | C6         | C7         | C8         | C9         | C10        | C11        | C12        | C13        | C14        | C15        | C16        |
|------------------------------|--------------|------------|------------|------------|------------|------------|------------|------------|------------|------------|------------|------------|------------|------------|------------|------------|------------|
| Lymphs, CD19+, Trans         | %95+         | 26.53      | 22.93      | 20.68      | 26.2       | 8.12       | 25.19      | 12.37      | 10.47      | 7.19       | 11.88      | 8.67       | 4.84       | 4.74       | 8.09       | 17.73      | 21.94      |
| Lymphs, CD19+, Trans         | #95+         | 5.05360685 | 1.89971565 | 1.13374998 | 6.16752192 | 0.30664441 | 1.71836205 | 0.7477665  | 1.78620975 | 2.22575366 | 1.38626389 | 0.75942541 | 1.48208931 | 0.47910858 | 0.51506765 | 2.12075445 | 0.91114889 |
| Lymphs, CD19+, MN            | %95+         | 4.25       | 6.44       | 10.4       | 7.65       | 4.2        | 6.01       | 4.2        | 4.89       | 4.67       | 5.71       | 3.8        | 1.57       | 3.89       | 7.98       | 4.32       | 12.77      |
| Lymphs, CD19+, MN            | #95+         | 7.1811825  | 10.6839613 | 11.13762   | 31.9526424 | 2.38080024 | 5.7709811  | 5.61015    | 6.2486733  | 12.9173881 | 6.25190983 | 4.48255296 | 10.5303605 | 7.99525082 | 2.99077632 | 4.18618368 | 15.337669  |
| Lymphs, CD19+, MA            | %95+         | 38.3       | 48.7       | 34.6       | 58.55      | 30.22      | 44.23      | 47.7       | 29.64      | 33.41      | 43.7       | 29.24      | 55.15      | 40.49      | 18.74      | 32.92      | 55.66      |
| Lymphs, CD19+, MA            | #95+         | 9.368946   | 8.15844315 | 25.699842  | 35.6766228 | 3.13419779 | 10.4208357 | 8.1388125  | 19.0368472 | 30.3862614 | 24.4203685 | 7.71164064 | 25.203197  | 13.151152  | 5.12366592 | 17.3742542 | 16.1134364 |
| Lymphs, CD19+, RM            | %95+         | 77.55      | 83.37      | 81.47      | 81.15      | 78.91      | 71.59      | 91.9       | 86.4       | 73.1       | 88.64      | 85.76      | 95.2       | 79.67      | 83.4       | 69.04      | 91.74      |
| Lymphs, CD19+, RM            | #95+         | 3.513015   | 2.45472127 | 1.85702718 | 7.52279976 | 4.2481672  | 4.97184389 | 3.763305   | 9.1523304  | 7.65482732 | 6.6324747  | 3.98899261 | 20.7910326 | 6.54165908 | 3.13210368 | 24.4906973 | 13.2476376 |
| Lymphs, CD19+, Trans         | %IgM+        | 76.1       | 59.87      | 62.3       | 70.34      | 45.36      | 65.4       | 86.35      | 88.9       | 68.9       | 74.4       | 64.7       | 73.31      | 65.5       | 78         | 66         | 71.1       |
| Lymphs, CD19+, Trans         | #IgM+        | 14.4960227 | 4.9601385  | 3.41550405 | 16.5581485 | 1.71297912 | 4.46132902 | 5.2198575  | 15.1665756 | 21.3288494 | 8.68165267 | 5.6672231  | 22.4487536 | 6.62059328 | 4.9660416  | 7.8945174  | 2.95272043 |
| Lymphs, CD19+, MN            | %IgM+        | 36.9       | 21.83      | 19.51      | 25.11      | 9.7        | 36.8       | 36.37      | 55.7       | 29.18      | 37.4       | 32.4       | 38.12      | 23.7       | 39.3       | 30.7       | 40.5       |
| Lymphs, CD19+, MN            | #IgM+        | 62.349561  | 36.2159744 | 20.8937468 | 104.87985  | 5.49851484 | 35.3364566 | 48.5812275 | 71.1760946 | 80.7129305 | 40.949462  | 38.2196621 | 255.679836 | 48.7114253 | 14.7290112 | 29.7490368 | 48.6433512 |
| Lymphs, CD19+, MA            | %IgM+        | 48.36      | 26.89      | 69.08      | 25.3       | 48.92      | 53.99      | 36.17      | 58.23      | 43.64      | 35.98      | 35.36      | 18.54      | 43.61      | 40.55      | 43.7       | 27.98      |
| Lymphs, CD19+, MA            | #IgM+        | 11.8298232 | 4.50473381 | 51.3105516 | 15.4162008 | 5.07362528 | 12.7203463 | 6.17150625 | 37.3993122 | 39.6904054 | 20.1062896 | 9.32570496 | 8.47266134 | 14.164528  | 11.0866944 | 23.0636364 | 8.10014285 |
| Lymphs, CD19+, Trans         | %IgM+        | 5.17       | 0          | 12.83      | 3.1        | 3.51       | 20.66      | 2.7        | 2.55       | 1.11       | 2.71       | 2.86       | 1.21       | 3.76       | 1.04       | 10.54      | 3.19       |
| Lymphs, CD19+, Trans         | #IgM+        | 0.234201   | 0          | 0.29244702 | 0.28737744 | 0.18896296 | 1.43481345 | 0.110565   | 0.27012086 | 0.11623609 | 0.20277534 | 0.13302844 | 0.26425577 | 0.30873149 | 0.03905741 | 3.73887528 | 0.46064927 |
| Lymphs, CD19+, RM            | %CD267-CD95+ | 20.1       | 15         | 11.6       | 13.6       | 3.82       | 7.19       | 10         | 3.66       | 2.04       | 2.38       | 2.48       | 1.5        | 2.43       | 0.74       | 2.43       | 4.24       |
| Lymphs, CD19+, Trans         | #CD267-CD95+ | 3.82877865 | 1.2427272  | 0.6359526  | 3.20146176 | 0.14425882 | 0.49047333 | 0.6045     | 0.6244057  | 0.6315073  | 0.27771953 | 0.21722895 | 0.4593252  | 0.06468977 | 0.04711373 | 0.29066178 | 0.17608347 |
| Lymphs, CD19+, Trans         | %CD267+CD95+ | 6.43       | 7.93       | 9.08       | 12.6       | 4.3        | 18         | 2.37       | 6.81       | 5.15       | 9.5        | 6.19       | 3.34       | 4.1        | 7.35       | 15.3       | 17.7       |
| Lymphs, CD19+, Trans         | #CD267+CD95+ | 1.2248282  | 0.65698845 | 0.49779738 | 2.96606016 | 0.16238559 | 1.22788872 | 0.1432665  | 1.16180405 | 1.59424636 | 1.10854436 | 0.54219646 | 1.02276411 | 0.41441882 | 0.46795392 | 1.83009267 | 0.73506542 |
| Lymphs, CD19+, Trans         | %CD267-CD95- | 7.2        | 6.61       | 9.58       | 4.6        | 11.7       | 10.1       | 4.74       | 17.5       | 16.8       | 19.2       | 16.4       | 12.1       | 17         | 25.4       | 24.3       | 7.42       |
| Lymphs, CD19+, Trans         | #CD267-CD95- | 1.3715028  | 0.54762845 | 0.52520913 | 1.08284736 | 0.44183985 | 0.688982   | 0.286533   | 2.98554638 | 5.20064832 | 2.2404265  | 1.43651405 | 3.70522328 | 1.71832192 | 1.61714688 | 2.90661777 | 0.30814607 |
| Lymphs, CD19+, Trans         | %CD267-CD95- | 66.3       | 70.5       | 69.7       | 69.2       | 80.2       | 64.7       | 82.9       | 72.1       | 76         | 68.9       | 74.9       | 83.1       | 78.2       | 66.5       | 58         | 70.7       |
| Lymphs, CD19+, Trans         | #CD267-CD95- | 12.629255  | 5.84081784 | 3.82119795 | 16.2897907 | 3.02868002 | 4.41357779 | 5.011305   | 12.3004511 | 23.5267424 | 8.03986383 | 6.56066477 | 25.4466161 | 7.90428083 | 4.2338688  | 6.9376062  | 2.93610878 |
| Lymphs, CD19+, Trans         | %CD267-IgM+  | 68.9       | 51.5       | 50.4       | 64.8       | 38.2       | 52.5       | 81.8       | 69.3       | 52         | 56.4       | 47.4       | 64.3       | 51.9       | 52.6       | 43.4       | 54.8       |
| Lymphs, CD19+, Trans         | #CD267-IgM+  | 13.1245199 | 4.26669672 | 2.7631044  | 15.2540237 | 1.44258824 | 3.5813421  | 4.94481    | 11.8227636 | 16.0972448 | 6.58125283 | 4.15187597 | 19.6897402 | 5.24593574 | 3.34889472 | 5.19124326 | 2.27579578 |
| Lymphs, CD19+, Trans         | %CD267+IgM+  | 7.2        | 8.37       | 11.9       | 5.54       | 7.16       | 12.9       | 4.55       | 19.6       | 16.9       | 18         | 17.3       | 9.01       | 13.6       | 25.4       | 22.6       | 16.3       |
| Lymphs, CD19+, Trans         | #CD267+IgM+  | 1.3715028  | 0.69344178 | 0.65239965 | 1.30412486 | 0.27039088 | 0.87998692 | 0.2750475  | 3.34381194 | 5.23160456 | 2.10039984 | 1.51534714 | 2.75901337 | 1.37465754 | 1.61714688 | 2.70327414 | 0.67692466 |
| Lymphs, CD19+, Trans         | %CD267+IgM-  | 6.68       | 5.29       | 6.31       | 11.6       | 8.59       | 13.7       | 2.55       | 4.62       | 5.42       | 10.6       | 5.26       | 5.18       | 7.55       | 7.35       | 17         | 9.54       |
| Lymphs, CD19+, Trans         | #CD267+IgM-  | 1.27244982 | 0.43826846 | 0.34593629 | 2.73065856 | 0.32439353 | 0.93455975 | 0.1541475  | 0.78818424 | 1.67782821 | 1.23690213 | 0.4607356  | 1.58620302 | 0.76313709 | 0.46795392 | 2.0334363  | 0.3961878  |
| Lymphs, CD19+, Trans         | %CD267-IgM-  | 17.2       | 34.8       | 31.4       | 18         | 46.1       | 20.9       | 11.1       | 6.46       | 25.6       | 15         | 30         | 21.5       | 27         | 14.7       | 17         | 19.4       |
| Lymphs, CD19+, Trans         | #CD267-IgM-  | 3.2763678  | 2.8831271  | 1.7214579  | 4.2372288  | 1.74092455 | 1.42571524 | 0.670995   | 1.10209312 | 7.92479744 | 1.7503332  | 2.6277696  | 6.5836612  | 2.72909952 | 0.93590784 | 2.0334363  | 0.80566493 |
| Lymphs, CD19+, Trans, CD267+ | %CD23dim     | 0          | 0          | 0          | 0          | 0          | 1          | 0          | 0          | 1          | 1          | 1          | 0          | 0          | 1          | 1          | 0          |
| Lymphs, CD19+, MN            | %CD267-CD95+ | 1.07       | 3.36       | 4.58       | 2.93       | 1.48       | 1.87       | 2.55       | 0.69       | 0.62       | 1.08       | 0.65       | 0.36       | 0.27       | 0.9        | 0.25       | 2.07       |
| Lymphs, CD19+, MN            | #CD267-CD95+ | 1.8079683  | 5.57424067 | 4.9048365  | 12.2380709 | 0.83894866 | 1.79562973 | 3.4061625  | 0.88171464 | 1.71494232 | 1.18249783 | 0.76675248 | 2.41460496 | 0.55494029 | 0.3373056  | 0.242256   | 2.48621573 |
| Lymphs, CD19+, MN            | %CD267+CD95+ | 3.18       | 3.08       | 5.82       | 4.72       | 2.72       | 4.14       | 1.65       | 4.2        | 4.05       | 4.63       | 3.15       | 1.21       | 3.62       | 7.08       | 4.07       | 10.7       |
| Lymphs, CD19+, MN            | #CD267+CD95+ | 5.3732142  | 5.10972062 | 6.2327835  | 19.7145715 | 1.54185158 | 3.97535137 | 2.2039875  | 5.36695866 | 11.2024458 | 5.069412   | 3.71580048 | 8.11575556 | 7.44031053 | 2.65347072 | 3.94392768 | 12.8514533 |
| Lymphs, CD19+, MN            | %CD267+CD95- | 25.4       | 11.6       | 15.6       | 14         | 22.8       | 25.5       | 5.64       | 34         | 43.9       | 31.9       | 33.2       | 12.6       | 24.9       | 57.6       | 48.3       | 21.7       |
| Lymphs, CD19+, MN            | #CD267+CD95- | 42.918126  | 19.2444023 | 16.70643   | 58.475424  | 12.9243442 | 24.4858599 | 7.53363    | 43.4468082 | 121.42898  | 34.9274823 | 39.1633574 | 84.5111736 | 51.1778266 | 21.5875584 | 46.8038592 | 26.0632277 |
| Lymphs, CD19+, MN            | %CD267-CD95- | 70.4       | 82         | 74         | 78.4       | 73         | 68.5       | 90.2       | 61.1       | 51.4       | 62.3       | 63         | 85.8       | 71.2       | 34.4       | 47.3       | 65.5       |
| Lymphs, CD19+, MN            | #CD267-CD95- | 118.954176 | 136.038016 | 79.24845   | 327.462374 | 41.3805756 | 65.7757413 | 120.48465  | 78.07647   | 142.17425  | 68.2166064 | 74.3160096 | 575.480849 | 146.339809 | 12.8925696 | 45.8348352 | 78.6701112 |
| Lymphs, CD19+, MN            | %CD267-IgM+  | 20.4       | 15.4       | 12.3       | 18         | 4.78       | 21.7       | 32.6       | 30.1       | 7.68       | 18.5       | 15.2       | 31.2       | 13.6       | 11.6       | 10.2       | 30.5       |
| Lymphs, CD19+, MN            | #CD267-IgM+  | 34.469676  | 25.5486031 | 13.1723775 | 75.182688  | 2.70957742 | 20.8369867 | 43.54545   | 38.4632037 | 21.2431565 | 20.2557499 | 17.9302118 | 209.265763 | 27.9525478 | 4.3474944  | 9.8840448  | 36.6326472 |
| Lymphs, CD19+, MN            | %CD267+IgM+  | 16.5       | 6.43       | 7.21       | 7.11       | 4.92       | 15.1       | 3.77       | 25.6       | 21.5       | 18.9       | 17.2       | 6.92       | 10.1       | 27.7       | 20.5       | 10         |
| Lymphs, CD19+, MN            | #CD267+IgM+  | 27.879885  | 10.6673713 | 7.72136925 | 29.6971618 | 2.78893742 | 14.49947   | 5.0357775  | 32.7128909 | 59.469774  | 20.6937121 | 20.2894502 | 46.4140731 | 20.7588774 | 10.3815168 | 19.864992  | 12.010704  |
| Lymphs, CD19+, MN            | %CD267+IgM-  | 12.4       | 7.45       | 13.7       | 11.6       | 20         | 13.9       | 3.52       | 12.6       | 27         | 17.2       | 19.1       | 5.67       | 18.4       | 37         | 31.9       | 22.8       |
| Lymphs, CD19+, MN            | #CD267+IgM-  | 20.952156  | 12.3595515 | 14.6716725 | 48.4510656 | 11.337144  | 13.3471942 | 4.70184    | 16.100876  | 74.682972  | 18.8323729 | 22.5307267 | 38.0300281 | 37.818153  | 13.867008  | 30.9118656 | 27.3844051 |
| Lymphs, CD19+, MN            | %CD267-IgM-  | 50.7       | 70.7       | 66.8       | 63.3       | 70.3       | 49.3       | 60.1       | 31.6       | 43.9       | 45.4       | 48.5       | 56.2       | 57.9       | 23.7       | 37.4       | 36.7       |
| Lymphs, CD19+, MN            | #CD267-IgM-  | 85.667283  | 117.291314 | 71.53779   | 264.392453 | 39.8500612 | 47.3393291 | 80.278575  | 40.3799747 | 121.42898  | 49.7087052 | 57.2115312 | 376.946663 | 119.003862 | 8.8823808  | 36.2414976 | 44.0792837 |

Table S3

| Parent gates          | Final gate     | C1        | C2         | C3         | C4         | C5         | C6         | C7         | C8         | C9         | C10        | C11        | C12        | C13        | C14        | C15        | C16        |
|-----------------------|----------------|-----------|------------|------------|------------|------------|------------|------------|------------|------------|------------|------------|------------|------------|------------|------------|------------|
| Lymphs, CD19+, MA     | %CD267-CD95+   | 3.6       | 10.4       | 2.7        | 7.05       | 2.22       | 3.63       | 6.2        | 1.04       | 1.61       | 2.2        | 3.04       | 8.05       | 2.59       | 1.44       | 0.82       | 3.06       |
| Lymphs, CD19+, MA     | #CD267-CD95+   | 0.880632  | 1.7422548  | 2.005479   | 4.2958188  | 0.23024219 | 0.85524833 | 1.057875   | 0.66795955 | 1.46428856 | 1.2294007  | 0.80175744 | 3.67879848 | 0.841232   | 0.39370752 | 0.43277304 | 0.88586266 |
| Lymphs, CD19+, MA     | %CD267+CD95+   | 34.7      | 38.3       | 31.9       | 51.5       | 28         | 40.6       | 41.5       | 28.6       | 31.8       | 41.5       | 26.2       | 47.1       | 37.9       | 17.3       | 32.1       | 52.6       |
| Lymphs, CD19+, MA     | #CD267+CD95+   | 8.488314  | 6.41618835 | 23.694363  | 31.380804  | 2.9039556  | 9.56558736 | 7.0809375  | 18.3688877 | 28.9219728 | 23.1909678 | 6.9098832  | 21.5243986 | 12.30992   | 4.7299584  | 16.9414812 | 15.2275738 |
| Lymphs, CD19+, MA     | %CD267-CD95-   | 55.7      | 42.3       | 57.8       | 33.1       | 61.3       | 49.9       | 47.7       | 69.1       | 65.2       | 54.5       | 68.8       | 33         | 57.6       | 79.6       | 65.9       | 41.7       |
| Lymphs, CD19+, MA     | #CD267+CD95-   | 13.625334 | 7.08628635 | 42.932106  | 20.1690216 | 6.35758851 | 11.7567194 | 8.1388125  | 44.3807741 | 59.2991392 | 30.4556083 | 18.1450368 | 15.0807888 | 18.70848   | 21.7632768 | 34.7801748 | 12.0720499 |
| Lymphs, CD19+, MA     | %CD267-CD95-   | 5.96      | 8.96       | 7.64       | 8.38       | 8.49       | 5.9        | 4.69       | 1.24       | 1.4        | 1.74       | 1.98       | 11.9       | 1.92       | 1.64       | 1.22       | 2.68       |
| Lymphs, CD19+, MA     | #CD267-CD95-   | 1.4579352 | 1.50101952 | 5.6747628  | 5.10623568 | 0.88052082 | 1.39007304 | 0.80023125 | 0.79641331 | 1.2732944  | 0.97234419 | 0.52219728 | 5.43822384 | 0.623616   | 0.44838912 | 0.64388184 | 0.77585357 |
| Lymphs, CD19+, MA     | %CD267-IgM+    | 4.26      | 1.49       | 4.88       | 1          | 1.82       | 2.49       | 1.97       | 0.83       | 0.84       | 0.58       | 0.46       | 4.14       | 0.11       | 0.55       | 0.2        | 0.38       |
| Lymphs, CD19+, MA     | #CD267-IgM+    | 1.0420812 | 0.24961151 | 3.6247176  | 6.099336   | 0.18875711 | 0.58665794 | 0.33613125 | 0.5330831  | 0.76397664 | 0.32411473 | 0.12131856 | 1.8919535  | 0.035728   | 0.1503744  | 0.1055544  | 0.11000909 |
| Lymphs, CD19+, MA     | %CD267+IgM+    | 44.1      | 25.4       | 64.2       | 24.3       | 47.1       | 51.5       | 34.2       | 57.4       | 42.8       | 35.4       | 34.9       | 14.4       | 43.5       | 40         | 43.5       | 27.6       |
| Lymphs, CD19+, MA     | #CD267+IgM+    | 10.787742 | 4.2551223  | 47.685834  | 14.8068648 | 4.88486817 | 12.1336884 | 5.835375   | 36.8662291 | 38.9264288 | 19.7821749 | 9.2043864  | 6.58070784 | 14.1288    | 10.93632   | 22.958082  | 7.99013376 |
| Lymphs, CD19+, MA     | %CD267+IgM-    | 46.5      | 55.2       | 25.4       | 60.3       | 42         | 39         | 54.9       | 40.3       | 54.2       | 60.6       | 60.1       | 65.3       | 52         | 57         | 54.4       | 66.8       |
| Lymphs, CD19+, MA     | #CD267+IgM-    | 11.37483  | 9.2473524  | 18.866358  | 36.7429608 | 4.3559334  | 9.1886184  | 9.3673125  | 25.8834326 | 49.2946832 | 33.8644011 | 15.8505336 | 29.8416821 | 16.8896    | 15.584256  | 28.7107968 | 19.3384397 |
| Lymphs, CD19+, MA     | %CD267-IgM-    | 5.2       | 17.9       | 5.57       | 14.4       | 9.1        | 7.03       | 8.93       | 1.45       | 2.12       | 3.42       | 4.57       | 16.1       | 4.4        | 2.53       | 1.84       | 5.16       |
| Lymphs, CD19+, MA     | #CD267-IgM-    | 1.272024  | 2.99868855 | 4.1372289  | 8.7744384  | 0.94378557 | 1.65630737 | 1.52368125 | 0.93128976 | 1.92813152 | 1.91115927 | 1.20527352 | 7.35759696 | 1.42912    | 0.69172224 | 0.97110048 | 1.49380762 |
| Lymphs, CD19+, RM     | %CD267-CD95+   | 3.45      | 4.17       | 8.57       | 5.75       | 3.51       | 2.59       | 14.2       | 3.4        | 4          | 7.24       | 2.86       | 14.9       | 9.77       | 5.7        | 5.04       | 7.64       |
| Lymphs, CD19+, RM     | #CD267-CD95+   | 0.156285  | 0.12278023 | 0.19534458 | 0.5330388  | 0.18896296 | 0.17987255 | 0.58149    | 0.36016115 | 0.4188688  | 0.54173191 | 0.13302844 | 3.25405868 | 0.80220923 | 0.21406464 | 1.78784928 | 1.10324778 |
| Lymphs, CD19+, RM     | %CD267+CD95+   | 74.1      | 79.2       | 72.9       | 75.4       | 75.4       | 69         | 77.7       | 83         | 69.1       | 81.4       | 82.9       | 80.3       | 69.9       | 77.7       | 64         | 84.1       |
| Lymphs, CD19+, RM     | #CD267+CD95+   | 3.35673   | 2.33194104 | 1.6616826  | 6.98976096 | 4.05920424 | 4.79197134 | 3.181815   | 8.79216925 | 7.23595852 | 6.09074279 | 3.85596418 | 17.536974  | 5.73944986 | 2.91803904 | 22.702848  | 12.1443899 |
| Lymphs, CD19+, RM     | %CD267-CD95-   | 22.4      | 12.5       | 17.1       | 16.6       | 17.5       | 25         | 8.11       | 13.6       | 26.2       | 11.3       | 14.3       | 4.33       | 19.5       | 16.1       | 30         | 7.64       |
| Lymphs, CD19+, RM     | #CD267+CD95-   | 1.01472   | 0.36804625 | 0.3897774  | 1.53885984 | 0.942123   | 1.7362215  | 0.3321045  | 1.4406446  | 2.74359064 | 0.84552081 | 0.66514219 | 0.94564256 | 1.60113408 | 0.60463872 | 10.64196   | 1.10324778 |
| Lymphs, CD19+, RM     | %CD267-CD95-   | 0         | 4.17       | 1.43       | 2.21       | 3.51       | 3.45       | 0          | 0          | 0.67       | 0          | 0          | 0.52       | 0.75       | 0.52       | 0.96       | 0.64       |
| Lymphs, CD19+, RM     | #CD267-CD95-   | 0         | 0.12278023 | 0.03259542 | 0.2048723  | 0.18896296 | 0.23959857 | 0          | 0          | 0.07016052 | 0          | 0          | 0.11356446 | 0.06158208 | 0.0195287  | 0.34054272 | 0.09241866 |
| Lymphs, CD19+, RM     | %CD267-IgM+    | 0         | 0          | 1.43       | 0          | 0          | 0.86       | 0          | 0          | 0          | 0          | 0          | 0          | 0          | 0          | 0.24       | 0.64       |
| Lymphs, CD19+, RM     | #CD267-IgM+    | 0         | 0          | 0.03259542 | 0          | 0          | 0.05972602 | 0          | 0          | 0          | 0          | 0          | 0          | 0          | 0          | 0.08513568 | 0.09241866 |
| Lymphs, CD19+, RM     | %CD267+IgM+    | 5.17      | 0          | 11.4       | 3.1        | 3.51       | 19.8       | 2.7        | 2.55       | 1.11       | 2.71       | 2.86       | 1.21       | 3.76       | 1.04       | 10.3       | 2.55       |
| Lymphs, CD19+, RM     | #CD267+IgM+    | 0.234201  | 0          | 0.2598516  | 0.28737744 | 0.18896296 | 1.37508743 | 0.110565   | 0.27012086 | 0.11623609 | 0.20277534 | 0.13302844 | 0.26425577 | 0.30873149 | 0.03905741 | 3.6537396  | 0.36823061 |
| Lymphs, CD19+, RM     | %CD267+IgM-    | 91.4      | 91.7       | 78.6       | 88.9       | 89.5       | 73.3       | 83.1       | 94         | 94.2       | 90         | 94.3       | 83         | 85.7       | 92.7       | 83.7       | 89.2       |
| Lymphs, CD19+, RM     | #CD267+IgM-    | 4.14042   | 2.69998729 | 1.7916084  | 8.24124336 | 4.8182862  | 5.09060144 | 3.402945   | 9.9573965  | 9.86436024 | 6.7342365  | 4.38621739 | 18.1266356 | 7.03677901 | 3.48136704 | 29.6910684 | 12.8808511 |
| Lymphs, CD19+, RM     | %CD267-IgM-    | 3.45      | 8.33       | 8.57       | 7.96       | 7.02       | 6.03       | 14.2       | 3.4        | 4.67       | 7.24       | 2.86       | 15.7       | 10.5       | 6.22       | 5.76       | 7.64       |
| Lymphs, CD19+, RM     | #CD267-IgM-    | 0.156285  | 0.24526602 | 0.19534458 | 0.73791111 | 0.37792591 | 0.41877663 | 0.58149    | 0.36016115 | 0.48902932 | 0.54173191 | 0.13302844 | 3.42877324 | 0.86214912 | 0.23359334 | 2.04325632 | 1.10324778 |
| Lymphs, CD19+         | %CD27-         | 77.4      | 83.4       | 73.8       | 82         | 85.2       | 84.4       | 81.6       | 60         | 71.6       | 68.4       | 76.2       | 88.9       | 86.5       | 55.3       | 68         | 73.5       |
| Lymphs, CD19+         | #CD27-         | 175.311   | 169.35204  | 145.017    | 427.056    | 67.45284   | 115.61112  | 132.6      | 133.806    | 298.7152   | 129.57012  | 121.79808  | 690.9308   | 224.7616   | 42.4704    | 147.084    | 126.6552   |
| Lymphs, CD19+, CD 27- | %CD10+         | 3.32      | 3.33       | 3.99       | 3.37       | 7.53       | 0.83       | 16.5       | 8.3        | 8.86       | 8.76       | 11         | 2.57       | 7.28       | 7.5        | 3.78       | 2.93       |
| Lymphs, CD19+, CD 27- | #CD10+         | 5.8203252 | 5.63942293 | 5.7861783  | 14.3917872 | 5.07919885 | 0.9595723  | 21.879     | 11.105898  | 26.4661667 | 11.3503425 | 13.3977888 | 17.7569216 | 16.3626445 | 3.18528    | 5.5597752  | 3.71099736 |
| Lymphs, CD19+, IgD-   | %CD27-         | 1.27      | 1.04       | 0.54       | 0.84       | 0.53       | 0.94       | 1.26       | 1.14       | 2.51       | 2.14       | 3.26       | 0.96       | 2.69       | 4.17       | 3.49       | 6.14       |
| Lymphs, CD19+, IgD-   | #CD27-         | 2.87655   | 2.111824   | 1.0611     | 4.37472    | 0.419601   | 1.287612   | 2.0475     | 2.542314   | 10.47172   | 4.053802   | 5.210784   | 7.46112    | 6.989696   | 3.20256    | 7.54887    | 10.580448  |
| Lymphs, CD19+, CD21-  | %CD27-         | 0.094     | 0.1        | 0.077      | 0.12       | 0.065      | 0.13       | 0.48       | 0.41       | 0.34       | 1.1        | 2.05       | 0.2        | 1.21       | 0.81       | 2.04       | 4.98       |
| Lymphs, CD19+, CD21-  | #CD27-         | 0.21291   | 0.20306    | 0.151305   | 0.62496    | 0.0514605  | 0.178074   | 0.78       | 0.914341   | 1.41848    | 2.08373    | 3.27672    | 1.5544     | 3.144064   | 0.62208    | 4.41252    | 8.581536   |
| Lymphs, CD19+         | %CD24+, CD38++ | 4.28      | 3.91       | 4.67       | 3.94       | 2.7        | 1.28       | 2.43       | 3.88       | 1.52       | 2.05       | 1.48       | 3.28       | 1.79       | 2.03       | 1.38       | 2.06       |
| Lymphs, CD19+         | #CD24+, CD38++ | 9.6942    | 7.939646   | 9.17655    | 20.51952   | 2.13759    | 1.753344   | 3.94875    | 8.652788   | 6.34144    | 3.883315   | 2.365632   | 25.49216   | 4.651136   | 1.55904    | 2.98494    | 3.549792   |
| Lymphs                | %CD38++ CD138+ | 0.16      | 0.091      | 0.023      | 0.048      | 0.032      | 0.054      | 0.068      | 0.092      | 0.075      | 0.19       | 0.14       | 0.12       | 0.17       | 0.14       | 0.023      | 0.036      |
| Lymphs                | #CD38++ CD138+ | 2.4       | 2.002      | 0.345      | 1.344      | 0.416      | 0.972      | 0.884      | 2.668      | 2.1        | 3.61       | 2.52       | 3.48       | 4.76       | 1.68       | 0.483      | 0.864      |
| Lymphs, CD38++ CD138+ | %CD20-         | 78.7      | 53.6       | 38.5       | 85.5       | 65.4       | 89.3       | 45.2       | 29.4       | 28.6       | 24.6       | 21.7       | 62.7       | 16.2       | 29.8       | 94.4       | 53.8       |
| Lymphs, CD38++ CD138+ | #CD20-         | 1.8888    | 1.073072   | 0.132825   | 1.14912    | 0.272064   | 0.867996   | 0.399568   | 0.784392   | 0.6006     | 0.88806    | 0.54684    | 2.18196    | 0.77112    | 0.50064    | 0.455952   | 0.464832   |
| Lymphs, CD3+          | %CD4+CD8-      | 61.1      | 64.6       | 67.8       | 66.7       | 50.6       | 64.8       | 70.2       | 58.3       | 44.6       | 74.8       | 63.3       | 69.8       | 66.4       | 69.9       | 37.3       | 71.1       |
| Lymphs, CD3+          | #CD4+CD8-      | 606.723   | 1102.8512  | 500.364    | 1157.912   | 513.084    | 976.2768   | 646.1208   | 1394.8275  | 806.7248   | 972.1008   | 925.1928   | 1331.9236  | 1318.1728  | 537.0732   | 639.9561   | 1278.0936  |
| Lymphs, CD3+          | %CD8+CD4-      | 36.1      | 29.5       | 28.4       | 25.3       | 36.9       | 27.6       | 23.6       | 33.7       | 42.6       | 21.6       | 33.1       | 26.7       | 29.2       | 26.3       | 59.4       | 24.3       |

Table S3

| Parent gates | Final gate   | C1       | C2        | C3       | C4       | C5      | C6        | C7        | C8        | C9        | C10       | C11       | C12       | C13       | C14       | C15       | C16       |
|--------------|--------------|----------|-----------|----------|----------|---------|-----------|-----------|-----------|-----------|-----------|-----------|-----------|-----------|-----------|-----------|-----------|
| Lymphs, CD3+ | #CD8+CD4-    | 358.473  | 503.624   | 209.592  | 439.208  | 374.166 | 415.8216  | 217.2144  | 806.2725  | 770.5488  | 280.7136  | 483.7896  | 509.4894  | 579.6784  | 211.1364  | 1019.1258 | 436.8168  |
| Lymphs, CD3+ | %CD4-CD8-    | 2.02     | 4.82      | 3.27     | 7.75     | 8.7     | 6.93      | 5.48      | 6.15      | 12.3      | 3.2       | 2.86      | 3.21      | 3.87      | 6.54      | 2.88      | 4.23      |
| Lymphs, CD3+ | #CD4-CD8-    | 20.0586  | 82.28704  | 24.1326  | 134.54   | 88.218  | 104.40738 | 50.43792  | 147.13875 | 222.4824  | 41.5872   | 41.80176  | 61.25322  | 76.82724  | 52.50312  | 49.41216  | 76.03848  |
| Lymphs, CD3+ | %CD4+CD8+    | 0.78     | 1.06      | 0.53     | 0.25     | 3.85    | 0.65      | 0.71      | 1.77      | 0.57      | 0.4       | 0.73      | 0.31      | 0.52      | 0.31      | 0.41      | 0.39      |
| Lymphs, CD3+ | #CD4+CD8+    | 7.7454   | 18.09632  | 3.9114   | 4.34     | 39.039  | 9.7929    | 6.53484   | 42.34725  | 10.31016  | 5.1984    | 10.66968  | 5.91542   | 10.32304  | 2.48868   | 7.03437   | 7.01064   |
| Lymphs, CD3- | %CD16+CD56+  | 40.1     | 27.5      | 18.3     | 39.9     | 12.9    | 26.5      | 37.1      | 15.7      | 50.6      | 56.6      | 37.6      | 18.5      | 59.3      | 66.3      | 13.2      | 62.8      |
| Lymphs, CD3- | #CD16+CD56   | 203.307  | 135.52    | 139.446  | 424.536  | 36.894  | 77.751    | 140.8316  | 79.6775   | 501.5472  | 339.8264  | 127.2384  | 183.483   | 483.1764  | 263.3436  | 50.7276   | 378.3072  |
| Lymphs, CD3- | %CD16+CD56-- | 2.26     | 2.27      | 5.06     | 3.43     | 5.02    | 9.3       | 5.58      | 4.1       | 3.44      | 8.14      | 5.98      | 3.35      | 4.24      | 10.2      | 4.18      | 5.12      |
| Lymphs, CD3- | #CD16+CD56-- | 11.4582  | 11.18656  | 38.5572  | 36.4952  | 14.3572 | 27.2862   | 21.18168  | 20.8075   | 34.09728  | 48.87256  | 20.23632  | 33.2253   | 34.54752  | 40.5144   | 16.06374  | 30.84288  |
| Lymphs, CD3- | %CD16-CD56+  | 2.35     | 1.89      | 1.96     | 1.52     | 1.81    | 1.43      | 1.97      | 1.81      | 1.56      | 0.92      | 2.92      | 2.14      | 2.44      | 2.58      | 3.38      | 2.89      |
| Lymphs, CD3- | #CD16-CD56+  | 11.9145  | 9.31392   | 14.9352  | 16.1728  | 5.1766  | 4.19562   | 7.47812   | 9.18575   | 15.46272  | 5.52368   | 9.88128   | 21.22452  | 19.88112  | 10.24776  | 12.98934  | 17.40936  |
| Lymphs, CD3- | %CD16+       | 42.36    | 29.77     | 23.36    | 43.33    | 17.92   | 35.8      | 42.68     | 19.8      | 54.04     | 64.74     | 43.58     | 21.85     | 63.54     | 76.5      | 17.38     | 67.92     |
| Lymphs, CD3- | #CD16+       | 214.7652 | 146.70656 | 178.0032 | 461.0312 | 51.2512 | 105.0372  | 162.01328 | 100.485   | 535.64448 | 388.69896 | 147.47472 | 216.7083  | 517.72392 | 303.858   | 66.79134  | 409.15008 |
| Lymphs, CD3- | %CD 56+      | 42.45    | 29.39     | 20.26    | 41.42    | 14.71   | 27.93     | 39.07     | 17.51     | 52.16     | 57.52     | 40.52     | 20.64     | 61.74     | 68.88     | 16.58     | 65.69     |
| Lymphs, CD3- | #CD 56+      | 215.2215 | 144.83392 | 154.3812 | 440.7088 | 42.0706 | 81.94662  | 148.30972 | 88.86325  | 517.00992 | 345.35008 | 137.11968 | 204.70752 | 503.05752 | 273.59136 | 63.71694  | 395.71656 |
