# Supplementary material
Source: PubMed Central journal article supplement (PMC5673557)
Supplement: NIHMS910027-supplement-9.pdf [file NIHMS910027-supplement-9.pdf]

**Table S5: Fluorescence intensity analysis for TACI and FasR expression in T1D vs. Control B cells**

|                    | <b>Controls</b> | <b>T1D</b>    | <b>p-value</b> |
|--------------------|-----------------|---------------|----------------|
| <b>CD19+ TACI+</b> | 2910 ± 709.1    | 2786 ± 301.9  | 0.9556         |
| <b>MN TACI+</b>    | 2301 ± 553      | 2340 ± 325.6  | 0.4016         |
| <b>MA TACI+</b>    | 3324 ± 915.9    | 3671 ± 667.3  | 0.1016         |
| <b>RM TACI+</b>    | 3532 ± 908.7    | 3978 ± 957.9  | 0.1486         |
| <b>C19+ FasR+</b>  | 493.9 ± 171.6   | 401.9 ± 140.6 | 0.1165         |
| <b>MN FasR+</b>    | 2319 ± 820.7    | 2632 ± 430.7  | 0.2099         |
| <b>MA FasR+</b>    | 3540 ± 663.8    | 4219 ± 1130   | 0.0615         |
| <b>RM FasR+</b>    | 6158 ± 1115     | 6287 ± 2890   | 0.724          |
